# Supplementary material for: Insight into the enhanced photocatalytic activity mechanism of the Ag3VO4/CoWO4p–n heterostructure under visible light
Source: Royal Society of Chemistry journal article supplement (doi:10.1039/d2ce00524g), 2022-01-01
Supplement: d2ce00524g1.pdf [file d2ce00524g1.pdf]

## Support material

# Insight into enhanced photocatalytic activity mechanism of $\text{Ag}_3\text{VO}_4/\text{CoWO}_4$ p-n heterostructure under visible-light

Jie Xiong<sup>1</sup>, Hong-Yan Zeng<sup>1\*</sup>, Jin-Feng Peng<sup>2\*</sup>, Sheng Xu<sup>1</sup>, Zhuo-Lin Yang<sup>1</sup>

<sup>1</sup> College of Chemical Engineering, Xiangtan University, Xiangtan, Hunan, 411105, China

<sup>2</sup> School of Mechanical Engineering, Xiangtan University, Xiangtan, Hunan, 411105, China

\*Corresponding Author:

Hong-Yan Zeng

Address: College of Chemical Engineering, Xiangtan University, Xiangtan, Hunan, 411105, China

E-mail address: hongyanzeng99@hotmail.com

Tel.: +86-0731-58298175

Jin-Feng Peng

E-mail address: [pengjinfeng@xtu.edu.cn](mailto:pengjinfeng@xtu.edu.cn)

### ***DFT calculation***

All the calculations based on DFT were carried out by using the CASTEP code. With the cutoff energy of 300 eV, the ultrasoft pseudopotentials were chosen to perform the calculation for the planewave basis set. The generalized gradient approximation (GGA) with the Perdew-Burke-Ernzerhof (PBE) exchange correlation function was adopted for the structural optimization and self-consistent total energy calculations<sup>1,2</sup>.

For the Ag<sub>3</sub>VO<sub>4</sub> models, when performing geometric optimization, the energy cut-off is set to 300.0 eV. The maximum force exerted on the atom is 0.05 eV/Å, the maximum atomic displacement is 0.002 Å, the self-consistent convergence accuracy was set at  $2 \times 10^{-5}$  eV per atom, the convergence criterion for the force between atoms was 0.05 eV Å<sup>-1</sup>. And the Monkhorst-Pack k-point grid is set to 3×3×1, and the optimized lattice parameters for Ag<sub>3</sub>VO<sub>4</sub> were found to be a = b = 5.67 Å and c = 10.20 Å in good agreement with experimental values (Fig. S1) and Powder Diffraction of the Ag<sub>3</sub>VO<sub>4</sub> was shown in Fig. S2. For the Ag<sub>3</sub>VO<sub>4</sub> (220) surface models, the Monkhorst-Pack k-point grid is set to 1×2×1. The energy cut-off is set to 260.0 eV, the maximum force exerted on the atom is 0.05 eV/Å, the maximum atomic displacement is 0.002 Å, and the maximum energy change is  $1.0 \times 10^{-5}$  eV/Å.

For the CoWO<sub>4</sub> models, when performing geometric optimization, the energy cut-off is set to 300.0 eV. The maximum force exerted on the atom is 0.05 eV/Å, the maximum atomic displacement is 0.002 Å, and the maximum energy change is  $1.0 \times 10^{-5}$  eV/Å. The Monkhorst-Pack k-point grid is set to 3×2×2, and the optimized lattice parameters for CoWO<sub>4</sub> were found to be a = 4.70, b = 5.77 Å and c = 5.06 Å in good agreement with experimental values (Fig. S3)

and Powder Diffraction of the  $\text{CoWO}_4$  was shown in Fig. S4. For the  $\text{CoWO}_4$  (-111) surface models, the Monkhorst-Pack k-point grid is set to  $1 \times 1 \times 1$ . The energy cut-off is set to 260.0 eV, the maximum force exerted on the atom is  $0.05 \text{ eV/\AA}$ , the maximum atomic displacement is  $0.002 \text{ \AA}$ , and the maximum energy change is  $1.0 \times 10^{-5} \text{ eV/\AA}$ .

Fig. S1

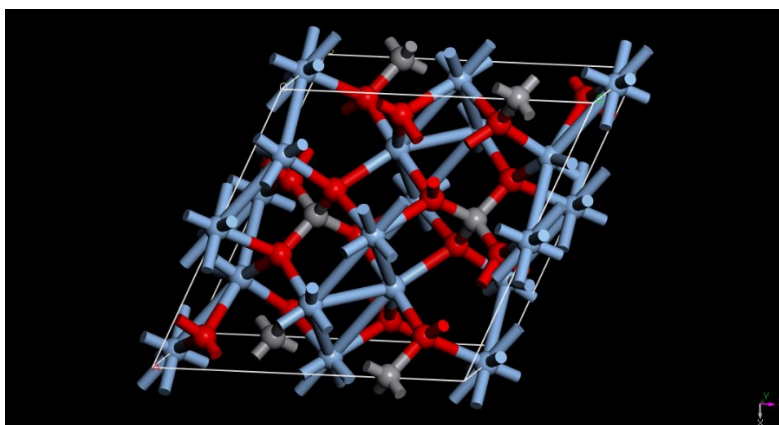

Atomic crystal structure diagram of the  $\text{Ag}_3\text{VO}_4$

Fig. S2

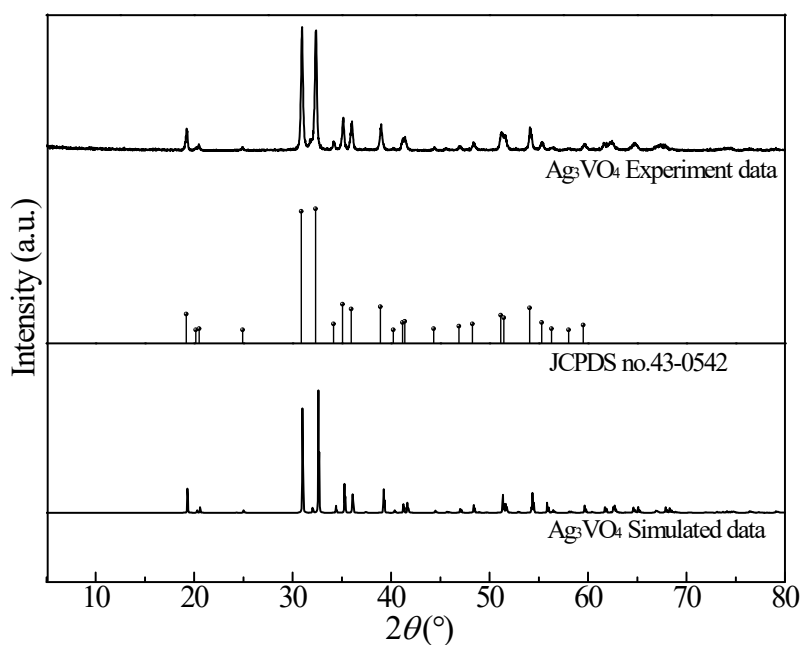

Powder Diffraction of the  $\text{Ag}_3\text{VO}_4$

Fig. S3

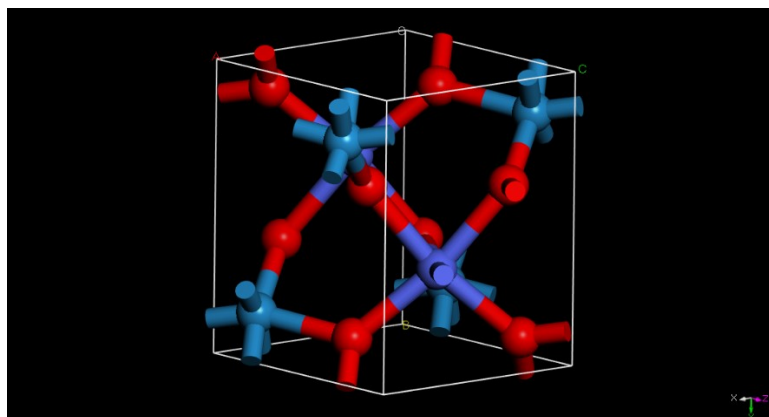

Atomic crystal structure diagram of the CoWO<sub>4</sub>

Fig. S4

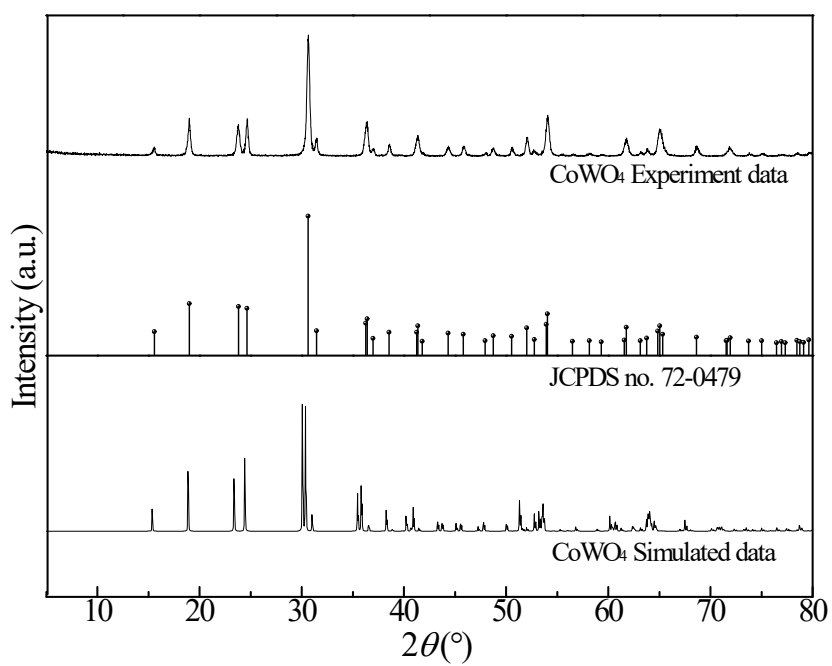

Powder Diffraction of the CoWO<sub>4</sub>

## References

- [1] Clark, S. J., Segall, M. D., Pickard, C. J., Hasnip, P. J., Probert, M. I., Refson, K., Payne, M. C. (2005). First principles methods using CASTEP. *Z. Krist.-Cryst. Mater.* 220(5-6), 567-570.
- [2] Perdew, J. P., Burke, K., Ernzerhof, M. (1997). Generalized gradient approximation made simple (vol 77, pg 3865, 1996). *Phys. Rev. Lett.* 78(7), 1396-1396.
